# Supplementary material for: High-Fat Diet-Induced Obese Effects of Adipocyte-Specific CXCR2 Conditional Knockout in the Peritoneal Tumor Microenvironment of Ovarian Cancer
Source: MDPI journal article supplement (doi:10.3390/cancers13195033), 2021-10-08
Supplement: s1 [file s1]

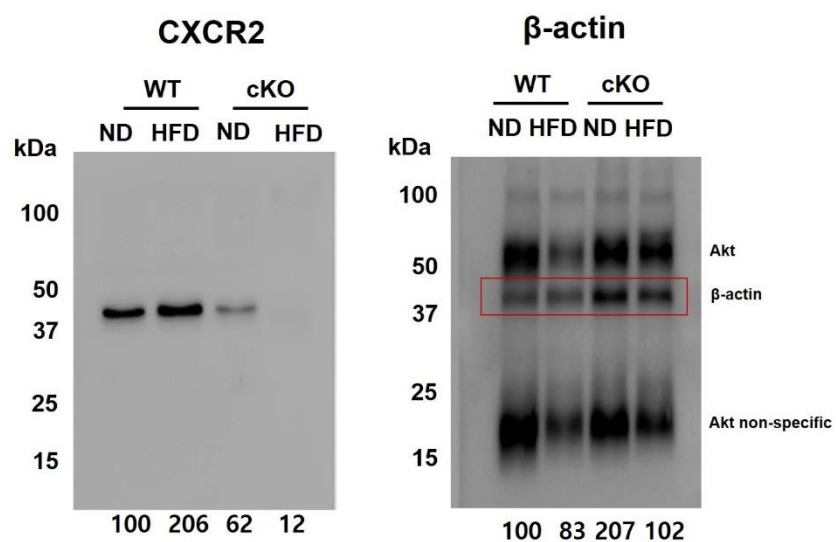

**Figure S1.** The full western blot of Figure 1B.

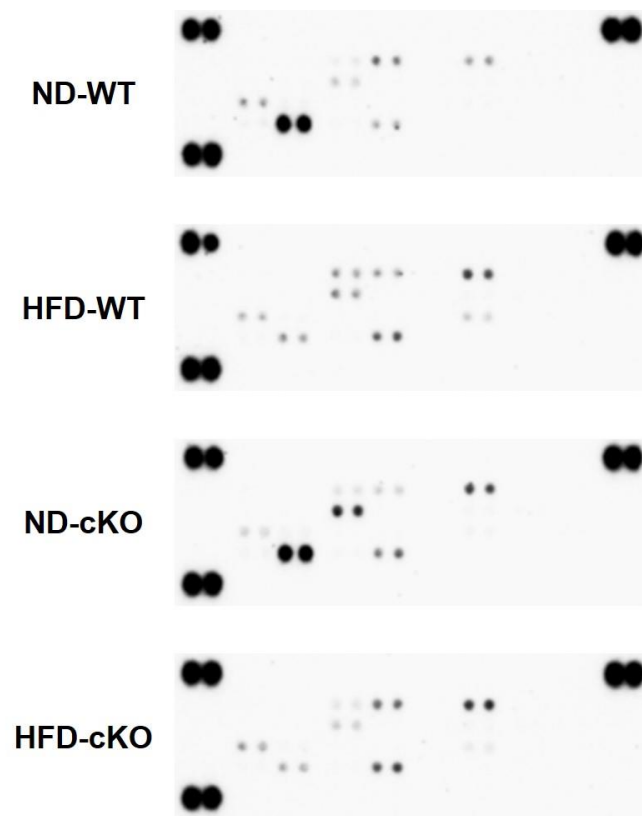

Figure S2. The full western blot of Figure 1E.

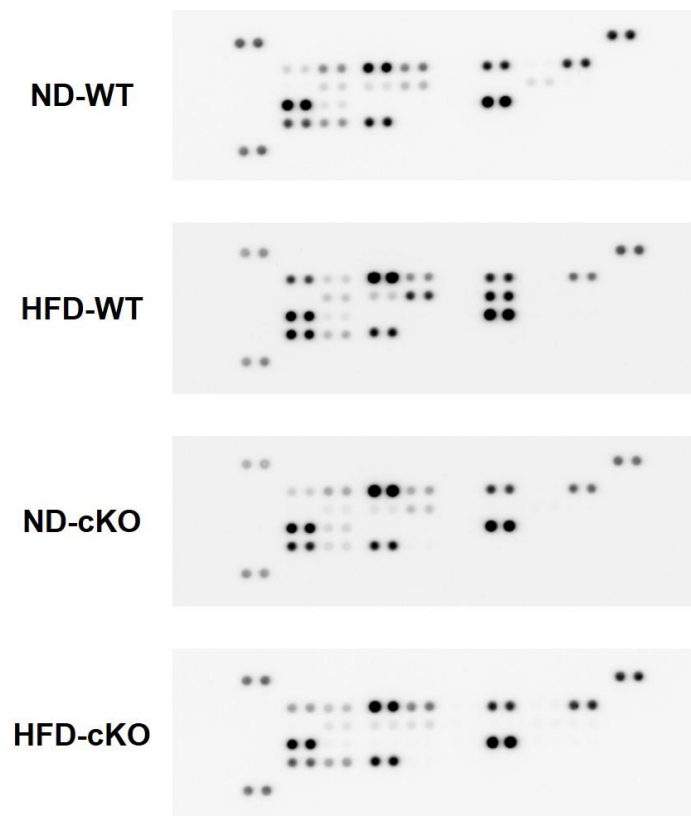

**Figure S3.** The full western blot of Figure 4C.
